# Supplementary material for: Regulation of Cr(VI)-Induced Premature Senescence in L02 Hepatocytes by ROS-Ca2+-NF-κB Signaling
Source: PubMed Central journal article supplement (PMC8881123; doi:10.1155/2022/7295224), 2022-02-18

**(A)**

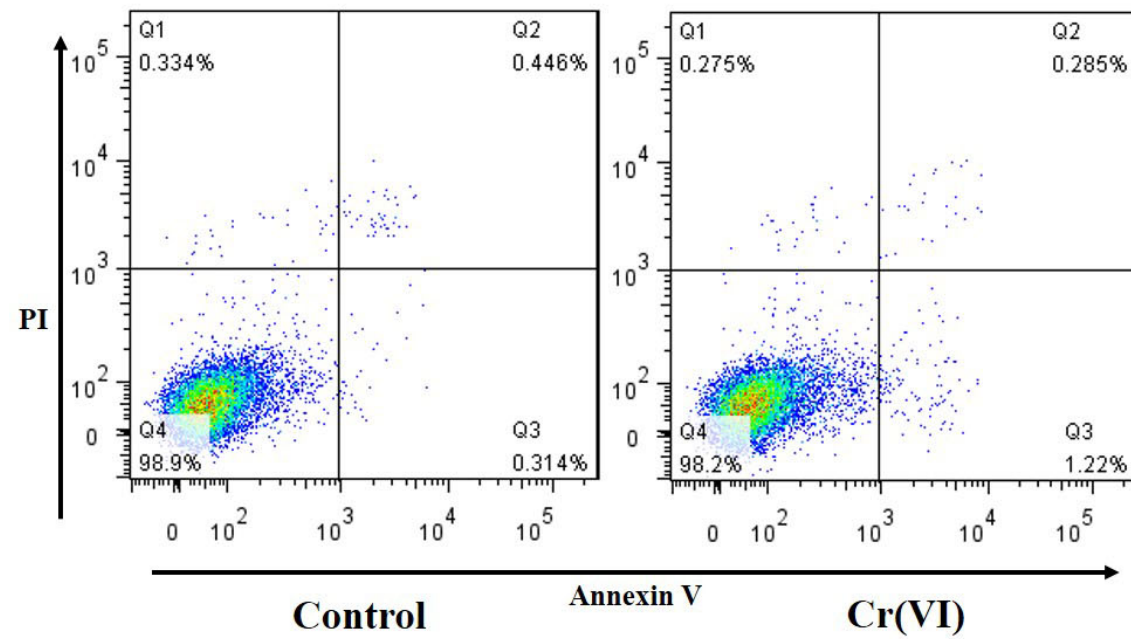

**(B)**

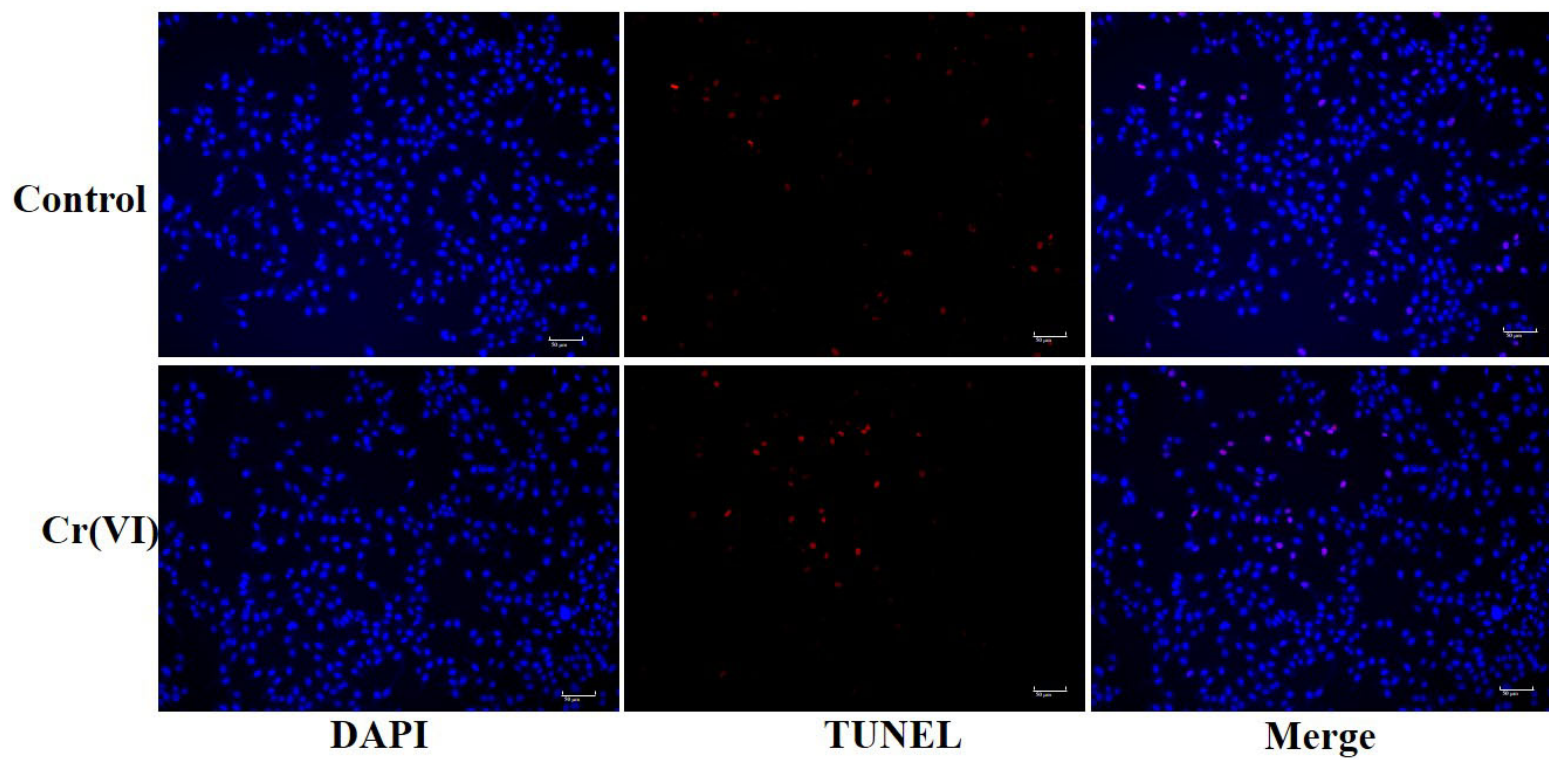

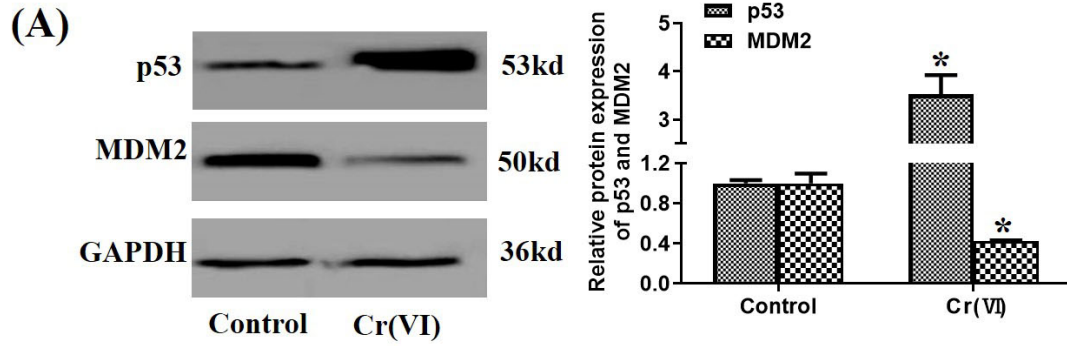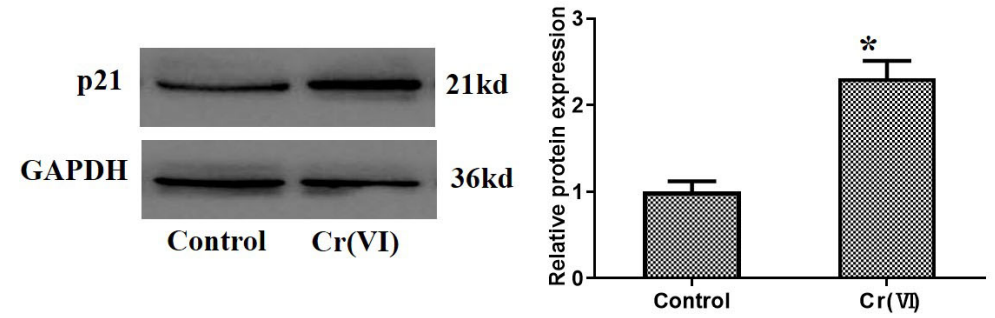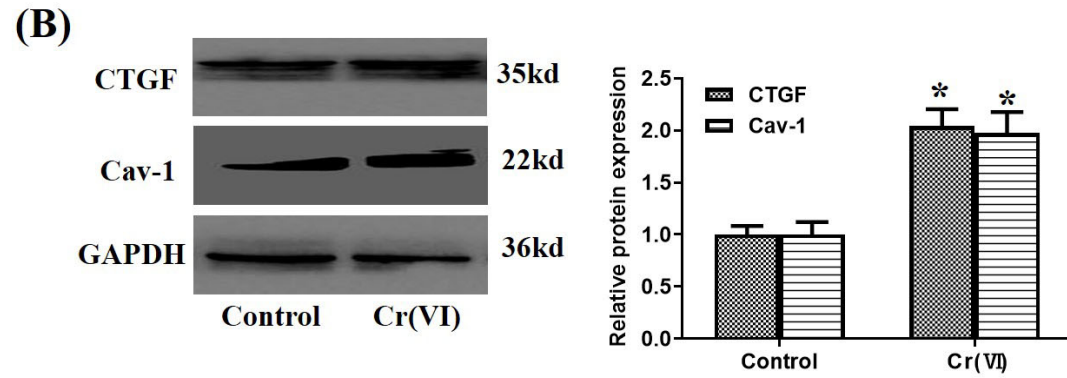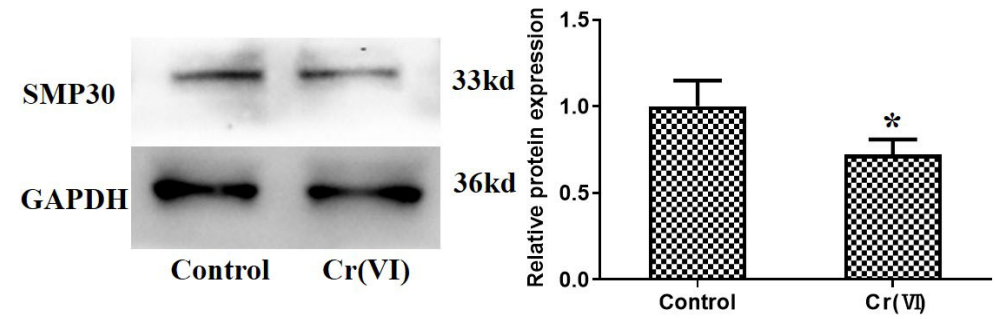

Supplement: 7295224.f1.pdf [file 7295224.f1.pdf]
